# Supplementary material for: Precise genetic control of ATOH1 enhances maturation of regenerated hair cells in the mature mouse utricle
Source: Research Square preprint supplement (doi:10.21203/rs.3.rs-3190105/v1), 2023-08-07
Supplement: Supplementary file 1 [file 67f500cd29513c3ba058f68a.xlsx]

## Sheet: NotchGenes
Table S3. Signature Scores (related to Figure 3 and 6, Figure S5, 12, 15 and 16)
Adam17
Aph1a
Cdkn1a
Cir1
Crebbp
Ctbp1
Ctbp2
Dll1
Dll3
Dll4
Dtx1
Dtx2
Dtx3
Dtx3l
Dtx4
Dvl1
Dvl2
Dvl3
Ep300
Hdac1
Hdac2
Hes1
Hes5
Hes6
Hey1
Hey2
Heyl
Id1
Id2
Id3
Id4
Jag1
Jag2
Kat2a
Kat2b
Lfng
Maml1
Maml2
Maml3
Mfng
Ncor2
Ncstn
Notch1
Notch2
Notch3
Notch4
Nrarp
Numb
Numbl
Psen1
Psen2
Psenen
Ptcra
Rbpj
Rbpjl
Rfng
Snw1

## Sheet: Type I Genes
Table S3. Signature Scores (related to Figure 3 and 6, Figure S5, 12, 15 and 16)
Adam11
Atp2b2
Map4k4
Car12
1810037I17Rik
Cacna2d4
Spp1
Bmp2
Efhd2
Lpgat1
Espn
Calm2
Bdnf
Fbxw7
Kcnab1
Acsl1
Ptprz1
Lpin2
Chchd10
2010107E04Rik
Cfap161
Gm1113
Nin
Ly6h
Synpr
Atp1a1
Atp5j
Tnfrsf21
Lrtm2
Gpx2
Ttc7
Kcna10
Dhrs3
Fam107b
Ero1lb
Hsd17b7
Wnt5a
Asphd2
Xirp2
Nek2
Sdc4
Ptprq
Aif1l
Gltp
App
Lbh
Rarb
Atp8a1
Irx2
Mycbpap
Tmem191c
Rgs9
Slco3a1
Ckb
Adgrd1
Klhdc8a
Pcdh20
Bcl2
Trp53inp1
Smim5
Tunar
Acss2
Plxna4
Lrrk1
AI593442
Cfap126
Car7
6030419C18Rik
Aftph
Sertad2
Arf3
Amigo1
2300009A05Rik
Rxra
Dnm1
Ighm
Zfp704
Rhobtb1
Paqr8
Cpne9
Slc4a4
Ablim2
Wdr95
Krt20
Sypl2
Kit
Gpr155
Rem2
Dlgap1
Dap
Atp2a2
Syt13
Sgk1
Cyp2g1
Gstm7
Clu
Hsd17b14
Gadd45g
Pjvk
Slc7a11

## Sheet: Type II Genes
Table S3. Signature Scores (related to Figure 3 and 6, Figure S5, 12, 15 and 16)
Sox2
S100a1
Ptn
Fbxo32
Otof
Pcp4
Pde4b
Brip1
Anxa5
Dlk2
Tjap1
Mogat1
Mgst3
Gas7
Osbpl6
Cfap45
Tox
Rprm
Calb2
Tctex1d1
Dtna
Klf6
Cxcl14
Ldhb
Shtn1
Tmod1
Sparc
Cited2
Pxdc1
Thsd7b
Ccer2
Stox1
Sparcl1
Acbd7
Ptgis
Osbpl9
Cib2
S100a13
Rnf182
Tmem255b
Slc17a8
Tpm1
Tshz2
Gm904
Atp2b1
Xpa
Lmo1
Hspa2
Sirt2
Arl6ip5
Card19
Xpnpep1
Rasd2
Enho
Akap14
Ndfip2
Rab13
Rbm24
Hip1
Cdk15
Psat1
Epha4
Grb14
Chst5
Cdkl2
Samd9l
2510002D24Rik
Lce6a
Cfap52
Hs3st6
Nfix
Mlf1
Lmo4
Kcnh8
Cyb5r1
Ciapin1
BC030867
Ppp2r2b
Tbx2
Nfia
Socs2
Mapt
Plscr2
Dera
Gabarapl1
Btg2
Acsl3
Mslnl
Ccl21a
Smim18
Isl1
Cdkn1a
Tmem218
Gm34653
Gm4791
RP23-354H24.9
Scn3b
Snhg11
Gm30191
Ifitm3

## Sheet: Mature HC Genes
Table S3. Signature Scores (related to Figure 3 and 6, Figure S5, 12, 15 and 16)
Calm2
Spp1
2300009A05Rik
Kcna10
Ptprz1
Hsd17b7
Pgm2l1
Atp2b2
Fbxo2
Xirp2
Abca5
Espn
Lpgat1
Tmem191c
Atp1b1
Chchd10
Car12
Apba1
Frmd4b
Car7
Kcnma1
Nceh1
Clu
Fscn2
Ptprq
AI593442
App
Ttll3
Ap3b2
Ttc7
Tbc1d7
Pcsk5
Aftph
Cfap161
Cabp2
Gfi1
Ighm
Malat1
Slc5a3
Zfp385a
Cdk5rap2
Zwint
Hs6st2
Gm32742
Syne1
D630023F18Rik
Cst6
Liph
Nek2
Gm1113
Nbeal1
Pjvk
Ccdc107
Gstm7
Map4k4
Gabrb3
Crip3
Elmod1
Kcp
Fam81b
Fdps
Lgmn
Mkrn2os
Clic5
Efr3a
Atp1a1
Rarb
Smpx
Sri
Kcnab1
Asic1
Nefl
Rab3ip
Scg5
Skor1
Mrps6
Hspa4l
Slk
Tmem59
Nbas
1810037I17Rik
Lrrc10b
Cxxc4
Rasal2
Sgk1
Kncn
Cpe
Gltp
Pls1
Chrna10
Hebp2
Arf3
Acss2
Pcx
Hopx
Cd82
Bdnf
Cldn14
Cdc14a
Smim5
Wdr95
Dennd5b
Rnf150
Hist3h2ba
Lpin2
Rnf128
Rem2
Tomt
Mapk8ip1
Hsph1
E230025N22Rik
Ttll7
Tango6
Rhobtb1
Lrtm2
Osbpl3
Synpr
Trim36
Slc7a11
Arfgef1
Zcchc12
Aif1l
Rxra
Nptn
Osbpl11
Cpeb4
Trim45
Pdzph1
Lbh
Veph1
A930033H14Rik
Pcdh7
Slc25a25
Wnt5a
Tnfrsf21
Plxna4
Akap9
Elovl4
Ephx1
Dhrs3
Asb8
Ccdc33
Cgn
Six2
Gipc3
Syt2
Hsp90aa1
Cacna2d4
Sdc4
Hist1h2bc
Nfat5
Dnaja4
Man1a2
Pde10a
Nipal1
Grxcr2
Mtus2
Gm47775
Gls
Cfap46
Mast2
Nefm
Ush1c
Asphd2
Zdhhc16
Cdkn2d
Adam11
Dnase2a
Peak1
Spryd3
Klhdc8a
Acsl1
Cfap43
Smpdl3a
Dnajc5b
Akr1b3
Pcdh20
Pik3r1
Neat1
Efhd2
Sema6d
Bmp2
Ocm
Bag2
Fam107b
Hcn1
Slc17a8
Phip
Gsn
Mycbpap
Rspo3
Lbx2
Ptgds
4933434E20Rik
Slc9a3r2
Fbxw7
Hspa1a
Cib3
Shtn1
Paqr9

## Sheet: Immature HC Genes
Table S3. Signature Scores (related to Figure 3 and 6, Figure S5, 12, 15 and 16)
Ccer2
Cdkn1c
Cryab
Mdk
Rasd2
Anxa4
Atoh1
Nrep
Cdkn1a
Psat1
Fabp5
Hes6
Psph
Ccl21a
Abracl
Grp
Mgst3
Ppp1r14b
Rplp0
Stmn1
Nnat
Rps26
Miat
Gal
Rps5
Tmsb10
Rps19
Sox4
Marc2
Btg2
Glrx3
Socs2
Igfbp2
Rps12
Clint1
Cldn3
Hspa2
Tox
Slc52a3
Sox2
Cdk4
Kif19a
Mfng
Naca
Krt7
Rpl23a
Hnrnpa1
Ly6e
Svbp
Lmo1
Rpl22
Dlk2
Pfn1
Dtna
Cd63
Nhsl1
Chst5
Rps28
Gm4791
Cadps2
Nfia
Brip1
Rps21
Rps15a
Rps20
Eif4a1
Tnc
Eny2
Rnf182
Mycl
Rps11
Parp1
Marcksl1
Rassf9
Dstn
Gadd45g
Cfl1
Eef1b2
Rplp2
Ier2
Eef1a1
Dctn3
Tpm1
Rpl11
Tmem173
Eya2
Mcm6
Srsf3
Chrng
Rps23
Eef1a2
Mthfd2
Tmem255b
Thsd7b
Actb
S100b
Pvalb
Gm47283
Rps9
Mfap4
